# Supplementary material
Source: PubMed Central journal article supplement (PMC3240896)
Supplement: NIHMS340628-supplement-01.pdf [file NIHMS340628-supplement-01.pdf]

## **Supplementary material**

### *Nurses' Health Study (NHS) and Health Professional Follow-up Study (HPFS)*

The NHS is a prospective cohort study of 121,700 female registered nurses who were 30–55 year old at study inception in 1976 when all of them completed a mailed questionnaire on their medical history and lifestyle. Between 1989 and 1990, a blood sample was obtained from 32,826 of the study participants. The HPFS is a prospective cohort study of 51,529 U.S. male health professionals who were 40 to 75 year old at study inception in 1986. A blood sample was obtained from 18,159 of these men between 1993 and 1999. In both cohorts, information about health and disease has been collected biennially by self-administered questionnaires since inception.

Supplementary Table 1. Genetic variants for CHD considered in this study.

| SNPs       | Genes (chr)                         | Alleles | Reported OR<br>(95% CI) | References           |
|------------|-------------------------------------|---------|-------------------------|----------------------|
| rs4977574  | <i>CDKN2A/CDKN2B</i> (9p21)         | A/G     | 1.29 (1.25-1.34)        | Kathiresan et al.(1) |
| rs17465637 | <i>MIA3</i> (1q41)                  | A/C     | 1.14 (1.10-1.19)        | Kathiresan et al.(1) |
| rs9818870  | <i>MRAS</i> (3q22)                  | C/T     | 1.15 (1.11-1.19)        | Erdmann et al. (2)   |
| rs12526453 | <i>PHACTR1</i> (6p24)               | C/G     | 1.12 (1.08-1.17)        | Kathiresan et al.(1) |
| rs9982601  | <i>MRPS6-SCL5A3-KCNE2</i> (21q22)   | C/T     | 1.20 (1.14-1.27)        | Kathiresan et al.(1) |
| rs646776   | <i>CELSR2-PSRC1-SORT1</i> (1p21)    | C/T     | 1.19 (1.13-1.26)        | Kathiresan et al.(1) |
| rs6725887  | <i>WDR12</i> (2q33)                 | C/T     | 1.17 (1.11-1.23)        | Kathiresan et al.(1) |
| rs2259816  | <i>HNF1A</i> (12q24)                | G/T     | 1.08 (1.05-1.11)        | Erdmann et al. (2)   |
| rs1746048  | <i>CXCL12</i> (10q11)               | C/T     | 1.17 (1.11-1.24)        | Kathiresan et al.(1) |
| rs1122608  | <i>LDLR</i> (19p13)                 | G/T     | 1.15 (1.10-1.20)        | Kathiresan et al.(1) |
| rs11206510 | <i>PCSK9</i> (1p32)                 | C/T     | 1.15 (1.10-1.21)        | Kathiresan et al.(1) |
| rs2048327  | <i>SLC22A3-LPAL2-LPA</i> (6q26-q27) | T/C     | Haplotypes              | Tregouet et al. (3)  |
| rs3127599  | <i>SLC22A3-LPAL2-LPA</i> (6q26-q27) | C/T     | CCTC: 1.82 (1.57-2.12)  | Tregouet et al. (3)  |
| rs7767084  | <i>SLC22A3-LPAL2-LPA</i> (6q26-q27) | T/C     | CTTG: 1.20 (1.13-1.27)  | Tregouet et al. (3)  |
| rs10755578 | <i>SLC22A3-LPAL2-LPA</i> (6q26-q27) | C/G     |                         | Tregouet et al. (3)  |

Supplementary Table 2. Allele frequency of CHD SNPs

| SNPs       | Alleles | Allele frequency† |       |       |      |
|------------|---------|-------------------|-------|-------|------|
|            |         | Ref               | NHS   | HPFS  | JHS  |
| rs4977574  | G       | 0.5               | 0.49  | 0.5   | 0.52 |
| rs17465637 | C       | 0.75              | 0.73  | 0.73  | 0.71 |
| rs9818870  | T       | 0.15              | 0.16  | 0.16  | 0.17 |
| rs12526453 | C       | 0.66              | 0.65  | 0.65  | 0.62 |
| rs9982601  | T       | 0.21              | 0.26  | 0.24  | 0.18 |
| rs646776   | T       | 0.71              | 0.79  | 0.77  | 0.77 |
| rs6725887  | C       | 0.14              | 0.16* | 0.16* | 0.12 |
| rs2259816  | T       | 0.38              | 0.32  | 0.34  | 0.37 |
| rs1746048  | C       | 0.83              | 0.85  | 0.83  | 0.84 |
| rs1122608  | G       | 0.73              | 0.75  | 0.75  | 0.77 |
| rs11206510 | T       | 0.85              | 0.82  | 0.81  | 0.80 |
| rs2048327  | C       | 0.35              | 0.36  | 0.33  | 0.31 |
| rs3127599  | T       | 0.33              | 0.29  | 0.3   | 0.29 |
| rs7767084  | C       | 0.16              | 0.17  | 0.16  | 0.16 |
| rs10755578 | G       | 0.43              | 0.47  | 0.49  | 0.44 |

\*: showing significant deviation from HWE.

†: frequency of risk alleles, except for SNPs at SLC22A3-LPAL2-LPA locus for which minor allele frequencies are presented; Ref, reference allele frequencies in the CEU panel of HapMap.

Supplementary Table 3. Haplotype associations of SLC22A3-LPAL2-LPA locus with CHD in NHS, HPFS, and JHS

| SLC22A3-LPAL2-LPA haplotypes   |           |           |            | Odds Ratios, 95% CI                  |                                    |                                     |
|--------------------------------|-----------|-----------|------------|--------------------------------------|------------------------------------|-------------------------------------|
| rs2048327                      | rs3127599 | rs7767084 | rs10755578 | NHS                                  | HPFS                               | JHS                                 |
| T                              | C         | T         | C          | 1.0                                  | 1.0                                | 1.0                                 |
| T                              | T         | T         | G          | 1.35 (1.01-1.81)                     | 1.13 (0.81-1.58)                   | 1.32 (0.99-1.76)                    |
| C                              | C         | C         | G          | 1.14 (0.86-1.53)                     | 1.19 (0.88-1.62)                   | 1.05 (0.79-1.40)                    |
| C                              | T         | T         | G          | 1.21 (0.91-1.62)                     | 0.97 (0.69-1.37)                   | 1.13 (0.85-1.50)                    |
| C                              | C         | T         | G          | 2.11 (0.90-4.94)                     | 0.97 (0.53-1.78)                   | 1.91 (0.87-4.17)                    |
| C                              | C         | T         | C          | 1.02 (0.40-2.56)                     | 0.93 (0.34-2.56)                   | 0.98 (0.41-2.32)                    |
| T                              | T         | T         | C          | 1.95 (0.99-3.81)                     | 1.60 (0.85-3.01)                   | 1.79 (0.92-3.51)                    |
| Test of haplotype associations |           |           |            | $\chi^2=10.8$ , with 6 d.f<br>P=0.09 | $\chi^2=3.8$ , with 6 d.f<br>P=0.7 | $\chi^2=9.0$ , with 6 d.f<br>P=0.17 |

**Supplementary Figure 1. Genetic Risk Score (GRS) Distribution:** Normal distributions of the GRS in the NHS, HPFS, and JHS controls.

**Supplementary Reference:**

1. Kathiresan S, Voight BF, Purcell S, et al. Genome-wide association of early-onset myocardial infarction with single nucleotide polymorphisms and copy number variants. *Nat Genet* 2009;41:334-41.
2. Erdmann J, Grosshennig A, Braund PS, et al. New susceptibility locus for coronary artery disease on chromosome 3q22.3. *Nat Genet* 2009;41:280-2.
3. Tregouet DA, König IR, Erdmann J, et al. Genome-wide haplotype association study identifies the SLC22A3-LPAL2-LPA gene cluster as a risk locus for coronary artery disease. *Nat Genet* 2009;41:283-5.

## Supplementary Figure 1

### HPFS

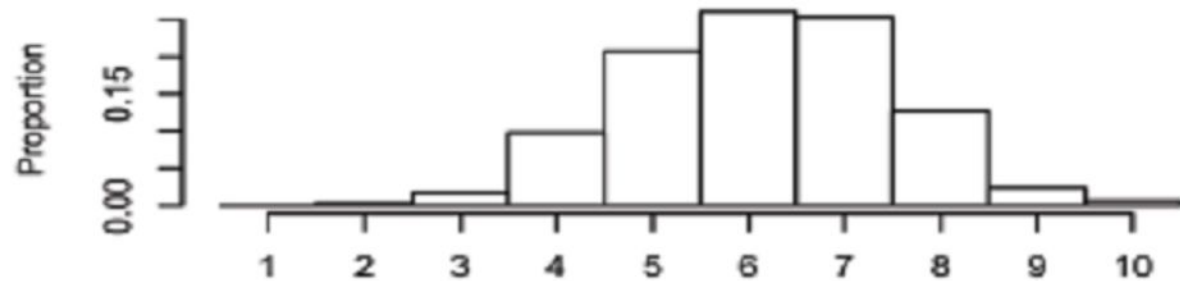

### NHS

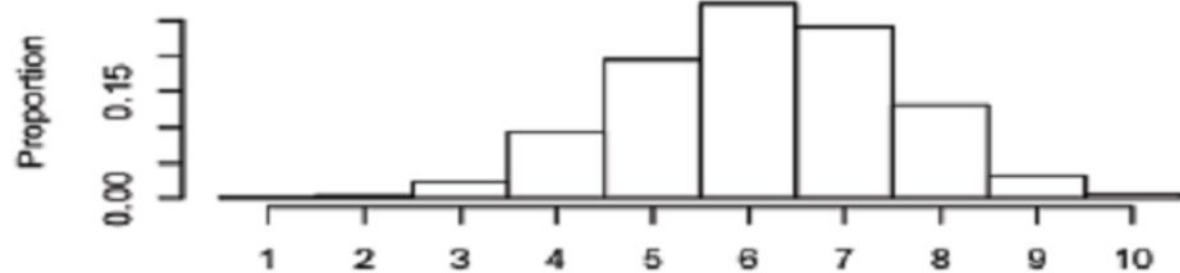

### JHS

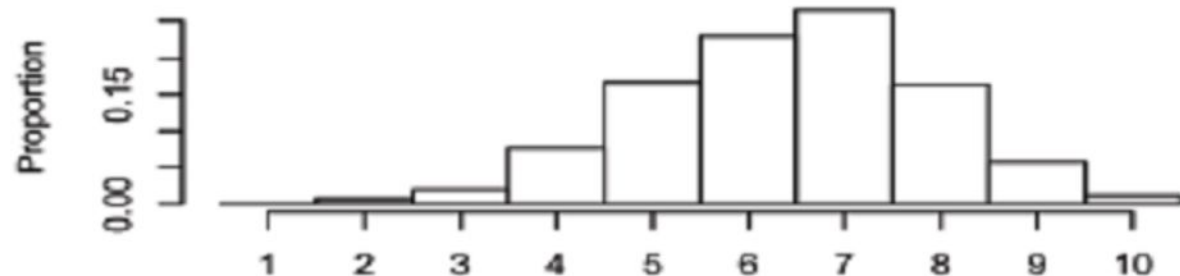

Genetic Risk Score (GRS)
